# Supplementary material
Source: publisher figshare collection journal article supplement (https://acs.figshare.com/ndownloader/files/5739177)
Supplement: Supplementary file 1 [file 5739177]

 
data_CRR-19 
 
_audit_creation_method            SHELXL-97 
_chemical_name_systematic 
; 
 ? 
; 
_chemical_name_common             ? 
_chemical_melting_point           ? 
_chemical_formula_moiety          ? 
_chemical_formula_sum 
 'C12.50 H33 N3 O10 P' 
_chemical_formula_weight          416.39 
 
loop_ 
 _atom_type_symbol 
 _atom_type_description 
 _atom_type_scat_dispersion_real 
 _atom_type_scat_dispersion_imag 
 _atom_type_scat_source 
 'C'  'C'   0.0033   0.0016 
 'International Tables Vol C Tables 4.2.6.8 and 6.1.1.4' 
 'H'  'H'   0.0000   0.0000 
 'International Tables Vol C Tables 4.2.6.8 and 6.1.1.4' 
 'N'  'N'   0.0061   0.0033 
 'International Tables Vol C Tables 4.2.6.8 and 6.1.1.4' 
 'O'  'O'   0.0106   0.0060 
 'International Tables Vol C Tables 4.2.6.8 and 6.1.1.4' 
 'P'  'P'   0.1023   0.0942 
 'International Tables Vol C Tables 4.2.6.8 and 6.1.1.4' 
 
_symmetry_cell_setting            Hexagonal 
_symmetry_space_group_name_H-M    P6(3)
 
loop_ 
 _symmetry_equiv_pos_as_xyz 
 'x, y, z' 
 'x-y, x, z+1/2' 
 '-y, x-y, z' 
 '-x, -y, z+1/2' 
 '-x+y, -x, z' 
 'y, -x+y, z+1/2' 
 
_cell_length_a                    12.2272(7) 
_cell_length_b                    12.2272(7) 
_cell_length_c                    15.8762(17) 
_cell_angle_alpha                 90.00 
_cell_angle_beta                  90.00 
_cell_angle_gamma                 120.00 
_cell_volume                      2055.6(3) 
_cell_formula_units_Z             4 
_cell_measurement_temperature     193(2) 
_cell_measurement_reflns_used     3940 
_cell_measurement_theta_min       2.3
_cell_measurement_theta_max       25.7
 
_exptl_crystal_description        plate
_exptl_crystal_colour             colorless 
_exptl_crystal_size_max           0.50 
_exptl_crystal_size_mid           0.35 
_exptl_crystal_size_min           0.05 
_exptl_crystal_density_meas       ? 
_exptl_crystal_density_diffrn     1.345 
_exptl_crystal_density_method     'not measured' 
_exptl_crystal_F_000              896 
_exptl_absorpt_coefficient_mu     0.186 
_exptl_absorpt_correction_type    multi-scan 
_exptl_absorpt_correction_T_min   0.91
_exptl_absorpt_correction_T_max   0.99 
_exptl_absorpt_process_details    
;
 Data were corrected for decay and absorption using the program SADABS 
 based on the method of R.H. Blessing (Acta Cryst. A51, 33-38, 1995).
;
 
_exptl_special_details 
; 
 ? 
; 
 
_diffrn_ambient_temperature       293(2) 
_diffrn_radiation_wavelength      0.71073 
_diffrn_radiation_type            MoK\a 
_diffrn_radiation_source          'normal-focus sealed tube' 
_diffrn_radiation_monochromator   graphite 
_diffrn_measurement_device_type   'Bruker SMART CCD area detector'
_diffrn_measurement_method        'omega scans'
_diffrn_detector_area_resol_mean  ? 
_diffrn_standards_number          ? 
_diffrn_standards_interval_count  ? 
_diffrn_standards_interval_time   ? 
_diffrn_standards_decay_%         0.0
_diffrn_reflns_number             12936 
_diffrn_reflns_av_R_equivalents   0.0661 
_diffrn_reflns_av_sigmaI/netI     0.0604 
_diffrn_reflns_limit_h_min        -15 
_diffrn_reflns_limit_h_max        15 
_diffrn_reflns_limit_k_min        -15 
_diffrn_reflns_limit_k_max        13 
_diffrn_reflns_limit_l_min        -20 
_diffrn_reflns_limit_l_max        20 
_diffrn_reflns_theta_min          1.92 
_diffrn_reflns_theta_max          27.09 
_reflns_number_total              3039 
_reflns_number_gt                 2412 
_reflns_threshold_expression      >2sigma(I) 
 
_computing_data_collection        'SMART (Bruker, 1998)'
_computing_cell_refinement        'SAINT (Bruker, 1998)' 
_computing_data_reduction         'SAINT (Bruker, 1998)' 
_computing_structure_solution     'SHELXS-97 (Sheldrick, 1997)' 
_computing_structure_refinement   'SHELXL-97 (Sheldrick, 1997)' 
_computing_molecular_graphics     'ORTEP-III (Burnett & Johnson, 1996)' 
_computing_publication_material   'CIFTAB (Sheldrick, 1997)'
 
_refine_special_details 
; 
 Refinement of F^2^ against ALL reflections.  The weighted R-factor wR and 
 goodness of fit S are based on F^2^, conventional R-factors R are based 
 on F, with F set to zero for negative F^2^. The threshold expression of 
 F^2^ > 2sigma(F^2^) is used only for calculating R-factors(gt) etc. and is 
 not relevant to the choice of reflections for refinement.  R-factors based 
 on F^2^ are statistically about twice as large as those based on F, and R- 
 factors based on ALL data will be even larger. 
; 
 
_refine_ls_structure_factor_coef  Fsqd  
_refine_ls_matrix_type            full 
_refine_ls_weighting_scheme       calc  
_refine_ls_weighting_details 
 'calc w=1/[\s^2^(Fo^2^)+(0.0723P)^2^+0.0000P] where P=(Fo^2^+2Fc^2^)/3' 
_atom_sites_solution_primary      direct 
_atom_sites_solution_secondary    difmap 
_atom_sites_solution_hydrogens    geom 
_refine_ls_hydrogen_treatment     noref 
_refine_ls_extinction_method      none 
_refine_ls_extinction_coef        ? 
_refine_ls_abs_structure_details 
 'Flack H D (1983), Acta Cryst. A39, 876-881' 
_refine_ls_abs_structure_Flack    0.03(15) 
_refine_ls_number_reflns          3039 
_refine_ls_number_parameters      163 
_refine_ls_number_restraints      1 
_refine_ls_R_factor_all           0.0738 
_refine_ls_R_factor_gt            0.0529 
_refine_ls_wR_factor_ref          0.1280 
_refine_ls_wR_factor_gt           0.1191 
_refine_ls_goodness_of_fit_ref    1.041 
_refine_ls_restrained_S_all       1.041 
_refine_ls_shift/su_max           0.000 
_refine_ls_shift/su_mean          0.000 
 
loop_ 
 _atom_site_label 
 _atom_site_type_symbol 
 _atom_site_fract_x 
 _atom_site_fract_y 
 _atom_site_fract_z 
 _atom_site_U_iso_or_equiv 
 _atom_site_adp_type 
 _atom_site_occupancy 
 _atom_site_symmetry_multiplicity 
 _atom_site_calc_flag 
 _atom_site_refinement_flags 
 _atom_site_disorder_assembly 
 _atom_site_disorder_group 
P1 P 0.6667 0.3333 0.71829(9) 0.0178(3) Uani 1 3 d S . . 
P2 P 1.0000 0.0000 0.55097(9) 0.0208(3) Uani 1 3 d S . . 
O1 O 0.2404(2) 0.0035(2) 0.61300(15) 0.0303(6) Uani 1 1 d . . . 
O2 O 0.1452(2) -0.1782(2) 0.68331(16) 0.0369(6) Uani 1 1 d . . . 
O3 O 0.6725(2) 0.1027(2) 0.65581(14) 0.0244(5) Uani 1 1 d . . . 
O4 O 0.5114(2) 0.0493(2) 0.56778(15) 0.0322(6) Uani 1 1 d . . . 
N1 N 0.4364(2) 0.1153(2) 0.71191(16) 0.0196(5) Uani 1 1 d . . . 
H1A H 0.3998 0.1608 0.6978 0.024 Uiso 1 1 calc R . . 
H1B H 0.4709 0.1045 0.6648 0.024 Uiso 1 1 calc R . . 
N2 N 0.7915(2) 0.0278(2) 0.55452(17) 0.0204(5) Uani 1 1 d . . . 
H2A H 0.8481 0.0991 0.5808 0.025 Uiso 1 1 calc R . . 
H2B H 0.7539 -0.0325 0.5941 0.025 Uiso 1 1 calc R . . 
C1 C 0.5408(3) 0.1910(3) 0.77334(18) 0.0200(6) Uani 1 1 d . . . 
H1C H 0.5753 0.1402 0.7948 0.024 Uiso 1 1 calc R . . 
H1D H 0.5083 0.2165 0.8205 0.024 Uiso 1 1 calc R . . 
C2 C 0.3352(3) -0.0120(3) 0.74162(19) 0.0210(7) Uani 1 1 d . . . 
H2 H 0.2986 -0.0015 0.7938 0.025 Uiso 1 1 calc R . . 
C3 C 0.2321(3) -0.0651(3) 0.6729(2) 0.0233(7) Uani 1 1 d . . . 
C4 C 0.3890(3) -0.0982(3) 0.7588(2) 0.0296(8) Uani 1 1 d . . . 
H4A H 0.4307 -0.1039 0.7092 0.044 Uiso 1 1 calc R . . 
H4B H 0.3217 -0.1808 0.7737 0.044 Uiso 1 1 calc R . . 
H4C H 0.4485 -0.0643 0.8043 0.044 Uiso 1 1 calc R . . 
C5 C 0.8608(3) -0.0112(3) 0.4954(2) 0.0235(7) Uani 1 1 d . . . 
H5A H 0.8884 0.0435 0.4464 0.028 Uiso 1 1 calc R . . 
H5B H 0.8056 -0.0972 0.4766 0.028 Uiso 1 1 calc R . . 
C6 C 0.6931(3) 0.0503(3) 0.51476(18) 0.0225(6) Uani 1 1 d . . . 
H6 H 0.6362 -0.0224 0.4799 0.027 Uiso 1 1 calc R . . 
C7 C 0.6191(3) 0.0674(3) 0.5855(2) 0.0219(7) Uani 1 1 d . . . 
C8 C 0.7537(3) 0.1687(3) 0.4617(2) 0.0325(8) Uani 1 1 d . . . 
H8A H 0.8158 0.2378 0.4947 0.049 Uiso 1 1 calc R . . 
H8B H 0.6903 0.1877 0.4432 0.049 Uiso 1 1 calc R . . 
H8C H 0.7936 0.1560 0.4136 0.049 Uiso 1 1 calc R . . 
O1M O 0.6667 0.3333 0.9745(3) 0.0584(15) Uani 1 3 d S . . 
C1M C 0.6667 0.3333 1.0673(5) 0.076(3) Uani 1 3 d S . . 
H1M1 H 0.7281 0.3126 1.0874 0.113 Uiso 0.33 1 calc PR . . 
H1M2 H 0.5845 0.2719 1.0874 0.113 Uiso 0.33 1 calc PR . . 
H1M3 H 0.6874 0.4155 1.0874 0.113 Uiso 0.33 1 calc PR . . 
O1W O 1.0000 0.0000 0.3156(3) 0.0572(14) Uani 1 3 d S . . 
O2W O -0.0460(3) -0.2536(3) 0.81354(17) 0.0488(8) Uani 1 1 d . . . 
O3W O 0.3410(3) -0.1000(3) 0.43875(18) 0.0555(9) Uani 1 1 d . . . 
 
loop_ 
 _atom_site_aniso_label 
 _atom_site_aniso_U_11 
 _atom_site_aniso_U_22 
 _atom_site_aniso_U_33 
 _atom_site_aniso_U_23 
 _atom_site_aniso_U_13 
 _atom_site_aniso_U_12 
P1 0.0156(4) 0.0156(4) 0.0222(6) 0.000 0.000 0.00781(19) 
P2 0.0167(4) 0.0167(4) 0.0291(7) 0.000 0.000 0.0084(2) 
O1 0.0250(13) 0.0245(13) 0.0393(14) 0.0061(10) -0.0072(10) 0.0108(11) 
O2 0.0256(13) 0.0206(12) 0.0446(14) 0.0083(11) -0.0068(11) -0.0034(10) 
O3 0.0223(11) 0.0207(12) 0.0298(13) -0.0016(9) -0.0012(10) 0.0105(10) 
O4 0.0237(12) 0.0451(15) 0.0343(13) -0.0082(11) -0.0048(10) 0.0220(11) 
N1 0.0179(12) 0.0178(12) 0.0242(13) 0.0026(11) 0.0023(11) 0.0097(10) 
N2 0.0158(12) 0.0210(13) 0.0244(14) -0.0017(11) -0.0008(11) 0.0091(10) 
C1 0.0232(16) 0.0192(15) 0.0190(15) 0.0020(11) 0.0017(12) 0.0116(13) 
C2 0.0187(15) 0.0144(14) 0.0242(16) 0.0012(11) 0.0021(12) 0.0039(12) 
C3 0.0163(15) 0.0226(16) 0.0303(17) 0.0003(14) 0.0016(13) 0.0092(14) 
C4 0.0307(18) 0.0221(17) 0.0343(18) 0.0065(14) -0.0014(15) 0.0119(15) 
C5 0.0191(16) 0.0229(16) 0.0291(17) -0.0065(13) -0.0005(13) 0.0111(14) 
C6 0.0180(15) 0.0227(16) 0.0272(16) -0.0053(13) -0.0043(12) 0.0105(14) 
C7 0.0205(17) 0.0163(15) 0.0278(18) -0.0013(12) -0.0009(13) 0.0084(13) 
C8 0.038(2) 0.040(2) 0.0301(18) 0.0009(15) 0.0005(15) 0.0273(18) 
O1M 0.060(2) 0.060(2) 0.054(3) 0.000 0.000 0.0302(11) 
C1M 0.087(4) 0.087(4) 0.052(5) 0.000 0.000 0.044(2) 
O1W 0.0576(19) 0.0576(19) 0.056(3) 0.000 0.000 0.0288(10) 
O2W 0.0551(18) 0.0501(18) 0.0442(17) 0.0036(13) 0.0102(13) 0.0285(15) 
O3W 0.075(2) 0.061(2) 0.0418(18) -0.0148(14) -0.0192(15) 0.0426(17) 
 
_geom_special_details 
; 
 All esds (except the esd in the dihedral angle between two l.s. planes) 
 are estimated using the full covariance matrix.  The cell esds are taken 
 into account individually in the estimation of esds in distances, angles 
 and torsion angles; correlations between esds in cell parameters are only 
 used when they are defined by crystal symmetry.  An approximate (isotropic) 
 treatment of cell esds is used for estimating esds involving l.s. planes. 
; 
 
loop_ 
 _geom_bond_atom_site_label_1 
 _geom_bond_atom_site_label_2 
 _geom_bond_distance 
 _geom_bond_site_symmetry_2 
 _geom_bond_publ_flag 
P1 C1 1.866(3) 3_655 ? 
P1 C1 1.866(3) . ? 
P1 C1 1.866(3) 5_665 ? 
P2 C5 1.860(3) . ? 
P2 C5 1.860(3) 3_645 ? 
P2 C5 1.860(3) 5_765 ? 
O1 C3 1.238(4) . ? 
O2 C3 1.265(4) . ? 
O3 C7 1.255(4) . ? 
O4 C7 1.253(4) . ? 
N1 C2 1.500(4) . ? 
N1 C1 1.502(4) . ? 
N2 C5 1.494(4) . ? 
N2 C6 1.501(4) . ? 
C2 C4 1.520(4) . ? 
C2 C3 1.543(4) . ? 
C6 C8 1.511(4) . ? 
C6 C7 1.521(4) . ? 
O1M C1M 1.472(10) . ? 
 
loop_ 
 _geom_angle_atom_site_label_1 
 _geom_angle_atom_site_label_2 
 _geom_angle_atom_site_label_3 
 _geom_angle 
 _geom_angle_site_symmetry_1 
 _geom_angle_site_symmetry_3 
 _geom_angle_publ_flag 
C1 P1 C1 99.85(12) 3_655 . ? 
C1 P1 C1 99.85(12) 3_655 5_665 ? 
C1 P1 C1 99.85(12) . 5_665 ? 
C5 P2 C5 99.36(13) . 3_645 ? 
C5 P2 C5 99.36(13) . 5_765 ? 
C5 P2 C5 99.36(13) 3_645 5_765 ? 
C2 N1 C1 116.2(2) . . ? 
C5 N2 C6 115.4(2) . . ? 
N1 C1 P1 108.73(19) . . ? 
N1 C2 C4 110.9(2) . . ? 
N1 C2 C3 106.9(2) . . ? 
C4 C2 C3 112.4(3) . . ? 
O1 C3 O2 125.5(3) . . ? 
O1 C3 C2 119.1(3) . . ? 
O2 C3 C2 115.5(3) . . ? 
N2 C5 P2 108.9(2) . . ? 
N2 C6 C8 110.8(2) . . ? 
N2 C6 C7 107.5(2) . . ? 
C8 C6 C7 108.7(3) . . ? 
O4 C7 O3 125.5(3) . . ? 
O4 C7 C6 117.0(3) . . ? 
O3 C7 C6 117.4(3) . . ? 
 
loop_ 
 _geom_torsion_atom_site_label_1 
 _geom_torsion_atom_site_label_2 
 _geom_torsion_atom_site_label_3 
 _geom_torsion_atom_site_label_4 
 _geom_torsion 
 _geom_torsion_site_symmetry_1 
 _geom_torsion_site_symmetry_2 
 _geom_torsion_site_symmetry_3 
 _geom_torsion_site_symmetry_4 
 _geom_torsion_publ_flag 
C2 N1 C1 P1 171.71(19) . . . . ? 
C1 P1 C1 N1 -146.2(2) 3_655 . . . ? 
C1 P1 C1 N1 111.9(3) 5_665 . . . ? 
C1 N1 C2 C4 -63.4(3) . . . . ? 
C1 N1 C2 C3 173.8(2) . . . . ? 
N1 C2 C3 O1 -6.8(4) . . . . ? 
C4 C2 C3 O1 -128.7(3) . . . . ? 
N1 C2 C3 O2 172.8(3) . . . . ? 
C4 C2 C3 O2 50.9(4) . . . . ? 
C6 N2 C5 P2 167.66(19) . . . . ? 
C5 P2 C5 N2 149.7(2) 3_645 . . . ? 
C5 P2 C5 N2 -109.1(3) 5_765 . . . ? 
C5 N2 C6 C8 -70.5(3) . . . . ? 
C5 N2 C6 C7 170.9(2) . . . . ? 
N2 C6 C7 O4 -159.0(3) . . . . ? 
C8 C6 C7 O4 81.0(3) . . . . ? 
N2 C6 C7 O3 23.4(4) . . . . ? 
C8 C6 C7 O3 -96.6(3) . . . . ? 
 
_diffrn_measured_fraction_theta_max    0.999 
_diffrn_reflns_theta_full              27.09 
_diffrn_measured_fraction_theta_full   0.999 
_refine_diff_density_max    0.595 
_refine_diff_density_min   -0.244 
_refine_diff_density_rms    0.072 
